# Supplementary material
Source: publisher site journal article supplement (https://www.dovepress.com/article/291170)
Supplement: Supplementary file 1 [file get_supplementary_file.php]

Table 1s. Demographic criteria of TE patients

| Trigger factors |  |
| --- | --- |
| Physical stress (Sleep disturbances, overworked) | 53(27.46%) |
| emotional stress | 44(22.80%) |
| Nutritional deficiencies (losing weight) | 27(13.99%) |
| Postpartum | 25(12.95%) |
| seasonal hair loss | 19(9.84%) |
| change of residence | 6(3.11%) |
| Severe febrile illnesses | 4(2.07%) |
| major surgeries | 1(0.52%) |
| Unidentified | 13(6.73%) |
| Duration(months) |  |
| ATE(n=64) | 2.625 |
| CTE(n=129) | 20.8 |
| ALL | 193(100%) |

Table 2s. Demographic criteria of FAGA patients

| Severity | Mild(n=76) | Moderate(n=25) | Severe(n=3) |
| --- | --- | --- | --- |
| Duration(years) | 2.85 | 7.3 | 18.3 |
| Family history(n) | 27 | 18 | 3 |

Table 3s Post-hoc test between different groups

|  | | | Mean Difference (I-J) | Std. Error | Sig. | 95% Confidence Interval | |
| --- | --- | --- | --- | --- | --- | --- | --- |
| Lower Bound | Upper Bound |
| LSD | HC | TE | 21.28189* | 3.15759 | 0.000 | 15.0774 | 27.4864 |
| FAGA | 5.14400 | 3.75807 | 0.172 | -2.2404 | 12.5284 |
| TE | HC | -21.28189* | 3.15759 | 0.000 | -27.4864 | -15.0774 |
| FAGA | -16.13789* | 3.72263 | 0.000 | -23.4527 | -8.8231 |
| FAGA | HC | -5.14400 | 3.75807 | 0.172 | -12.5284 | 2.2404 |
| TE | 16.13789* | 3.72263 | 0.000 | 8.8231 | 23.4527 |
